## **Discovery of aryl aminothiazole $\gamma$ -secretase modulators with novel effects on amyloid $\beta$ -peptide production**

Sanjay Bhattarai<sup>a,†</sup>, Lei Liu<sup>b,†</sup>, Dennis J. Selkoe<sup>b</sup>, and Michael S. Wolfe<sup>a\*</sup>

<sup>a</sup>Department of Medicinal Chemistry, University of Kansas, Lawrence, Kansas 66045 USA

<sup>b</sup>Ann Romney Center for Neurologic Diseases, Department of Neurology, Brigham and Women's Hospital, Harvard Medical School, Boston, MA 02115 USA

<sup>†</sup>These authors contributed equally to the work.

### **\*Correspondence to:**

Michael S. Wolfe

Department of Medicinal Chemistry

University of Kansas

1567 Irving Hill Road

Gray-Little Hall, Room 2115

Lawrence, KS 66045 USA

Tel: 1-785-864-1002

Email: [mswolfe@ku.edu](mailto:mswolfe@ku.edu)

[orcid.org/0000-0002-5721-9092](https://orcid.org/0000-0002-5721-9092)

**Running title:** GSMs with novel effects on A $\beta$  production

## Abstract

A series of analogs based on a prototype aryl aminothiazole  $\gamma$ -secretase modulator (GSM) were synthesized and tested for their effects on the profile of 37-to-42-residue amyloid  $\beta$ -peptides ( $A\beta$ ) generated through processive proteolysis of precursor protein substrate by  $\gamma$ -secretase. Certain substitutions on the terminal aryl D ring resulted in an altered profile of  $A\beta$  production compared to that seen with the parent molecule. Small structural changes led to concentration-dependent increases in  $A\beta_{37}$  and  $A\beta_{38}$  production without parallel decreases in their precursors  $A\beta_{40}$  and  $A\beta_{42}$ , respectively. The new compounds therefore apparently also stimulate carboxypeptidase trimming of  $A\beta$  peptides  $\geq 43$  residues, providing novel chemical tools for mechanistic studies of processive proteolysis by  $\gamma$ -secretase.

**Key words:** Protease, processivity, Alzheimer's disease, ELISA.

Deposition of the 42-residue amyloid  $\beta$ -peptide (A $\beta$ 42) as cerebral plaques is a defining pathological feature of Alzheimer's disease (AD).<sup>1</sup> A $\beta$  peptides of 37-43 residues are secreted from cells after production through processing of the amyloid precursor protein (APP) by  $\gamma$ -secretase, a membrane-embedded aspartyl protease complex with presenilin as the catalytic component.<sup>2</sup> More than 200 dominant missense mutations in the genes encoding APP and presenilins are associated with early-onset familial AD.<sup>3</sup> These mutations, found in the substrate or the enzyme that produces A $\beta$ , alter the production or the properties of A $\beta$  in ways that lead to cerebral plaque deposition. In particular, the ratio of the aggregation-prone A $\beta$ 42 to the predominant and more soluble A $\beta$ 40 is thought to be the critical factor leading to nucleation into neurotoxic oligomers.<sup>4</sup> For this reason, the discovery and development of A $\beta$ 42-lowering  $\gamma$ -secretase modulators (GSMs) is considered a promising path to therapeutics for the prevention or treatment of AD.<sup>5</sup>

Proteolytic processing of APP substrate within its single transmembrane domain by  $\gamma$ -secretase is complex, involving first endoproteolytic ( $\epsilon$ ) cleavage to release the APP intracellular domain and production of A $\beta$ 48 or A $\beta$ 49.<sup>6</sup> These long A $\beta$  peptides, containing most of the APP transmembrane domain are then trimmed—generally in intervals of three amino acids—through a carboxypeptidase function of  $\gamma$ -secretase.<sup>7</sup> Thus, A $\beta$  production occurs through processive proteolysis along two pathways: A $\beta$ 49→A $\beta$ 46→A $\beta$ 43→A $\beta$ 40→A $\beta$ 37 and A $\beta$ 48→A $\beta$ 45→A $\beta$ 42→A $\beta$ 38. Detailed biochemical analysis of the effects of familial AD mutations in APP and presenilin reveal shifts in  $\epsilon$  proteolysis toward proportionally more A $\beta$ 48 formation in many cases, resulting in increased A $\beta$ 42/A $\beta$ 40.<sup>8,9</sup> In addition, deficiencies in carboxypeptidase trimming can contribute to increased A $\beta$ 42/A $\beta$ 40 while also increasing levels of longer A $\beta$  peptide intermediates.<sup>10-12</sup>

Remarkably, the effects of GSMs on A $\beta$  production appear to be limited to the final trimming step. Most reported GSMs lower A $\beta$ 42 levels and increase A $\beta$ 38 levels by stimulating the A $\beta$ 42→A $\beta$ 38 cleavage event.<sup>5</sup> Some classes of molecules, including aryl aminothiazoles such as the prototype **1** (**Table 1**), additionally stimulates A $\beta$ 40→A $\beta$ 37.<sup>13</sup> The mechanism by which

GSMs exert their effects is largely unknown, although a new structure of a GSM bound to  $\gamma$ -secretase indicates a binding site on presenilin.<sup>14</sup> Particularly unclear is how these compounds selectively stimulate only the final cleavage event. Toward better understanding of processive proteolysis by  $\gamma$ -secretase and the selective effects of GSMs, we synthesized a series of analogues of **1** to find compounds that might also stimulate other trimming events. Compound **1** was chosen for modification because of its ability to stimulate  $A\beta_{40}\rightarrow A\beta_{37}$  in addition to  $A\beta_{42}\rightarrow A\beta_{38}$ , demonstrating that stimulation of cleavage events other than  $A\beta_{42}\rightarrow A\beta_{38}$  is possible.

For this initial study attempting to alter the  $A\beta$  profile of **1**, we chose the aryl D ring for modification, focusing on removal or replacement of the alkyl groups. Target compounds (**1-31**) were synthesized in a convergent synthesis as shown in the scheme in **Table 1** where phenylethanone intermediate **I** was treated with aromatic/alicyclic thioureas under Hantzsch thiazole synthesis condition as previously reported.<sup>15-17</sup> Briefly for the synthesis of the intermediate **I**, 4-methylimidazole was coupled with 1-(3,4-difluorophenyl)ethan-1-one, and the resulting intermediate was brominated at the keto methyl group to produce **I** in good yields (for detail see supporting information). Intermediate aromatic/alicyclic thioureas were synthesized from commercially available nitrates, which were then subjected to Suzuki coupling and/or reduced to amines. The resultant amines were further reacted with benzoyl isothiocyanate to give protected ureas, followed by deprotection of benzoyl group to give intermediate aromatic/alicyclic thioureas in a high yield.

**Table 1.** Convergent synthesis of aminothiazole target compounds, D-ring substitution variants of lead compound **1**.

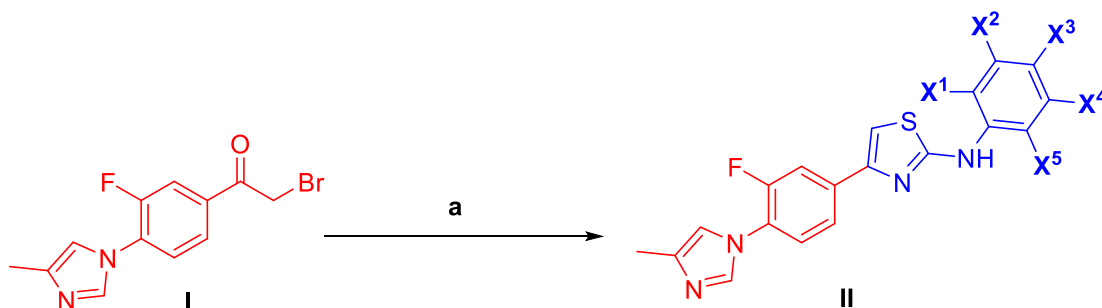

Target compounds **1-31** represented by structure **II** are phenyl-substituted derivatives excepts for **7, 9** and **10**, which are benzyl, adamantyl- and cyclohexyl-substituted, respectively

| Compd     | X <sup>1</sup>  | X <sup>2</sup> | X <sup>3</sup>  | X <sup>4</sup>                | X <sup>5</sup> | Compd     | X <sup>1</sup>  | X <sup>2</sup> | X <sup>3</sup>  | X <sup>4</sup>                | X <sup>5</sup> |
|-----------|-----------------|----------------|-----------------|-------------------------------|----------------|-----------|-----------------|----------------|-----------------|-------------------------------|----------------|
| <b>1</b>  | CH <sub>3</sub> | -              | CH <sub>3</sub> | C <sub>2</sub> H <sub>5</sub> | -              | <b>17</b> | Cl              | -              | Cl              | -                             | -              |
| <b>2</b>  | CH <sub>3</sub> | -              | CH <sub>3</sub> | CH <sub>3</sub>               | -              | <b>18</b> | F               | -              | -               | F                             | -              |
| <b>3</b>  | F               | -              | F               | F                             | -              | <b>19</b> | F               | -              | -               | -                             | F              |
| <b>4</b>  | -               | -              | OH              | -                             | -              | <b>20</b> | -               | -              | F               | F                             | -              |
| <b>5</b>  | CH <sub>3</sub> | -              | CH <sub>3</sub> | -                             | -              | <b>21</b> | F               | -              | -               | -                             | -              |
| <b>6</b>  | -               | -              | -               | -                             | -              | <b>22</b> | -               | F              | -               | -                             | -              |
| <b>7</b>  | -               | -              | benzyl          | -                             | -              | <b>23</b> | -               | -              | F               | -                             | -              |
| <b>8</b>  | -               | -              | nitro           | -                             | -              | <b>24</b> | F               | -              | CH <sub>3</sub> | CH <sub>3</sub>               | -              |
| <b>9</b>  | -               | -              | adamantly       | -                             | -              | <b>25</b> | CH <sub>3</sub> | -              | F               | CH <sub>3</sub>               | -              |
| <b>10</b> | -               | -              | cyclohexyl      | -                             | -              | <b>26</b> | CH <sub>3</sub> | -              | CH <sub>3</sub> | F                             | -              |
| <b>11</b> | Cl              | -              | Cl              | Cl                            | -              | <b>27</b> | F               | -              | CH <sub>3</sub> | C <sub>2</sub> H <sub>5</sub> | -              |
| <b>12</b> | Br              | -              | Br              | Br                            | -              | <b>28</b> | F               | -              | CH <sub>3</sub> | -                             | -              |
| <b>13</b> | F               | F              | F               | -                             | -              | <b>29</b> | CH <sub>3</sub> | -              | F               | -                             | -              |
| <b>14</b> | F               | -              | F               | -                             | F              | <b>30</b> | F               | -              | -               | CH <sub>3</sub>               | -              |
| <b>15</b> | F               | F              | -               | -                             | -              | <b>31</b> | CH <sub>3</sub> | -              | -               | F                             | -              |
| <b>16</b> | F               | -              | F               | -                             | -              |           |                 |                |                 |                               |                |

<sup>a</sup>Reagents and conditions: (a) aromatic or alicyclic thiourea 0.9 eq. , 3 mL EtOH, reflux, 4 h (60-97%) . Detail method for the synthesis of intermediates **I** and **II** are found in supporting information.

Compounds **2-10** (**Table 1**) were synthesized first and tested for effects on the profile of secreted peptides A $\beta$ 37, A $\beta$ 38, A $\beta$ 40, and A $\beta$ 42. This was performed using human embryonic kidney (HEK) 293 cells transiently transfected with direct  $\gamma$ -secretase substrate C99, the 99-residue C-terminal fragment of APP, with a signal sequence for membrane insertion during translation.<sup>18</sup> Each of four A $\beta$  peptides secreted into the media was detected using a sensitive and specific two-antibody (“sandwich”) ELISA (**Figure 1**).<sup>18</sup> The 2,4,5-trimethyl substituted **2** showed a similar effect on the profile of A $\beta$  peptides as the parent compound **1**, only with slightly reduced potency, demonstrating that the 5-ethyl substituent of **1** can be replaced with methyl

without much change in potency or profile. However, removal of the 5-methyl of **2** (compound **5**) resulted in >10-fold reduced potency, while removal of all methyl groups (**6**) resulted in dramatically reduced potency. Neither substitution of the phenyl ring in **6** with 4-hydroxyl or 4-nitro substitution (**4**, **8**) nor its replacement with benzyl (**7**), adamantyl (**9**), or cyclohexyl (**10**) led to improved activity. Interestingly, replacement of each methyl group in **2** with fluorine (**3**) resulted in an altered effect on the profile of A $\beta$  peptides, increasing A $\beta$ 37 levels up to fivefold with little or no effect on A $\beta$ 38, A $\beta$ 40, or A $\beta$ 42.

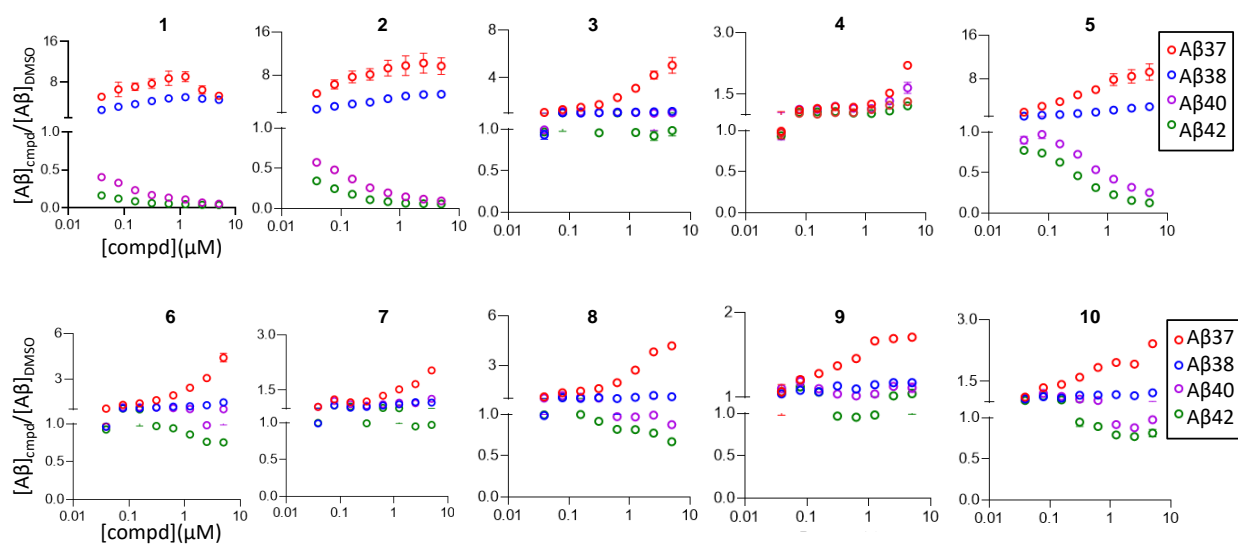

**Figure 1.** Concentration-dependent effects of **1-10** on A $\beta$ , relative to DMSO vehicle alone, from HEK293 cells transiently transfected with APP C99. Individual A $\beta$  variants (boxed) were measured by specific sandwich ELISAs.

Given the unique effect of **3** on the profile of A $\beta$  peptides, a new series of compounds (**11-31**) was generated to explore the SAR of variations on **3** (**Table 1**). For these analyses, an HEK293 cell line stably expressing C99 with the signal sequence (C99 HEK 293 cells) was generated, to reduce well-to-well variability in A $\beta$  levels associated with transient transfections. Each new compound was tested at a single high concentration (5  $\mu$ M) for initial evaluation (**Figure 2**). Replacement of the fluorines with chlorine (**11**) resulted in loss of activity, while replacement with bromines (**12**) regained the novel activity profile, increasing A $\beta$ 37 and A $\beta$ 38 without comparable

decreased in A $\beta$ 40 and A $\beta$ 42. Moving the 5-fluoro of **3** to the 6-position (**14**) led to increased A $\beta$ 37 and A $\beta$ 38, but now with substantial reduction in A $\beta$ 40 and A $\beta$ 42, while removal of the 5-fluoro of **3** (compound **16**) increased A $\beta$ 37 and A $\beta$ 38 as well as A $\beta$ 40 and A $\beta$ 42. Moving the 4-fluoro group of **16** to the 3-position (**15**) resulted in loss of activity, while replacing the 2- and 4-fluoro groups of **16** with chlorines (**17**) improved the A $\beta$ 37 and A $\beta$ 38 increases with little or no effects on A $\beta$ 40 and A $\beta$ 42. Removal of either 2-fluoro or the 4-fluoro of **3** (compounds **20** and **18**, respectively) resulted in loss of activity, and moving the 5-fluoro group of **18** to the 6-position (**19**) did not regain activity. Interestingly though, fluoro substitution alone in either the 2-, 3-, or 4-position (**21**, **22**, or **23**, respectively) led to slightly increased A $\beta$ 37 and A $\beta$ 38 as well as A $\beta$ 40 and A $\beta$ 42. Taken together, small differences in the substituent groups and their placement resulted in surprising differences in effects on the profile of A $\beta$  peptides, suggesting that the aryl D ring is tunable in this respect.

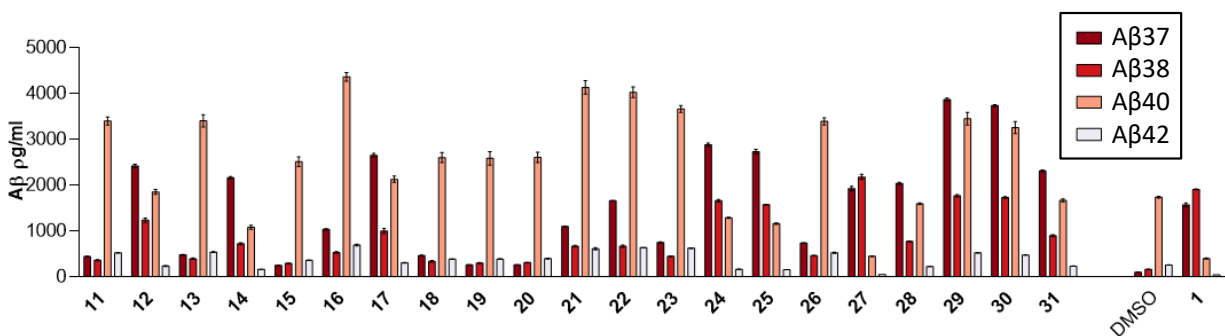

**Figure 2.** Effects of 5  $\mu$ M of **11-31** on A $\beta$  from HEK2993 cells stably transfected with APP C99. Individual A $\beta$  variants (boxed) were measured by specific sandwich ELISAs. A $\beta$  levels with control DMSO vehicle alone and with 5  $\mu$ M of parent compound **1** are shown on the right.

A series of analogs were also synthesized to replace only one of the three methyl groups of **2** with fluorine. Replacement of the 2- or 4-methyl group with fluorine (**24** or **25**, respectively) retained the ability to elevate A $\beta$ 37 and A $\beta$ 38, although with blunted effects on reduction of A $\beta$ 40 and A $\beta$ 42 compared with **2** (**Figure 2**). In contrast, replacement of the 5-methyl group with fluorine (**26**) resulted in substantial loss of activity. Interestingly, the 5-ethyl counterpart of **24** (compound **27**)—which is also the 2-fluoro counterpart of **1**—displayed stronger effects on lowering A $\beta$ 40 and

A $\beta$ 42 levels compared with **24**. Compounds **28-31** represent demethylated counterparts of **24-26**, and each of these compounds retained the ability to increase A $\beta$ 37 and A $\beta$ 38 without lowering A $\beta$ 40 and A $\beta$ 42.

Compounds **28-31** were selected for dose-response effects in the C99 HEK 293 cell line (**Figure 3**). All compounds showed smooth dose-response effects on elevation of A $\beta$ 37 and A $\beta$ 38. Each of the new compounds was less effective at elevating A $\beta$ 38 compared with prototype **1**. However, compounds **28-31** showed stronger effects on A $\beta$ 37 elevation compared to **1**, and A $\beta$ 37 elevation did not correspond with lowering of precursor A $\beta$ 40. This is especially true for **29** and **30**, which showed very little dose-dependent lowering effects on A $\beta$ 40. Indeed, as compound concentration increased, A $\beta$ 37 levels continued to increase, while A $\beta$ 40 levels were lowered slightly and then start to rise again at the maximum 10  $\mu$ M tested. Similar concentration-dependent effects are seen with A $\beta$ 38 and its precursor A $\beta$ 42.

The finding that some of the aryl aminothiazole analogs increase A $\beta$ 37 and A $\beta$ 38 without comparable lowering of their precursors A $\beta$ 40 and A $\beta$ 42, respectively, suggests that these compounds are also stimulating prior carboxypeptidase trimming steps along the two processive proteolytic pathways A $\beta$ 49→A $\beta$ 46→A $\beta$ 43→A $\beta$ 40→A $\beta$ 37 and A $\beta$ 48→A $\beta$ 45→A $\beta$ 42→A $\beta$ 38. The compounds do not stimulate overall activity, as levels of endoproteolytic cleavage co-product APP intracellular domain (AICD) are not elevated at the highest concentration test (10  $\mu$ M) as determined by western blot (data not shown). Total secreted A $\beta$  peptides, detected by ELISA, were not elevated by these compounds relative to DMSO control alone, except for slight elevations with **29**, **30**, and **31** at the highest concentration (10  $\mu$ M) (**Figure 3**). Unfortunately, there are no specific ELISAs for the longer A $\beta$  peptide intermediates ranging from A $\beta$ 45 to A $\beta$ 49. Furthermore, these peptides are membrane-anchored and not normally secreted.<sup>6</sup> For these reasons, they are difficult to detect in cell-based assays. Specific ELISAs do exist for the secreted A $\beta$ 43 peptide;<sup>18</sup> however, this assay was not sensitive enough for detection in this study, even in our stably transfected C99-expressing cell line (data not shown). Thus, we can only speculate at this point that prior trimming steps are stimulated by the new analogs.



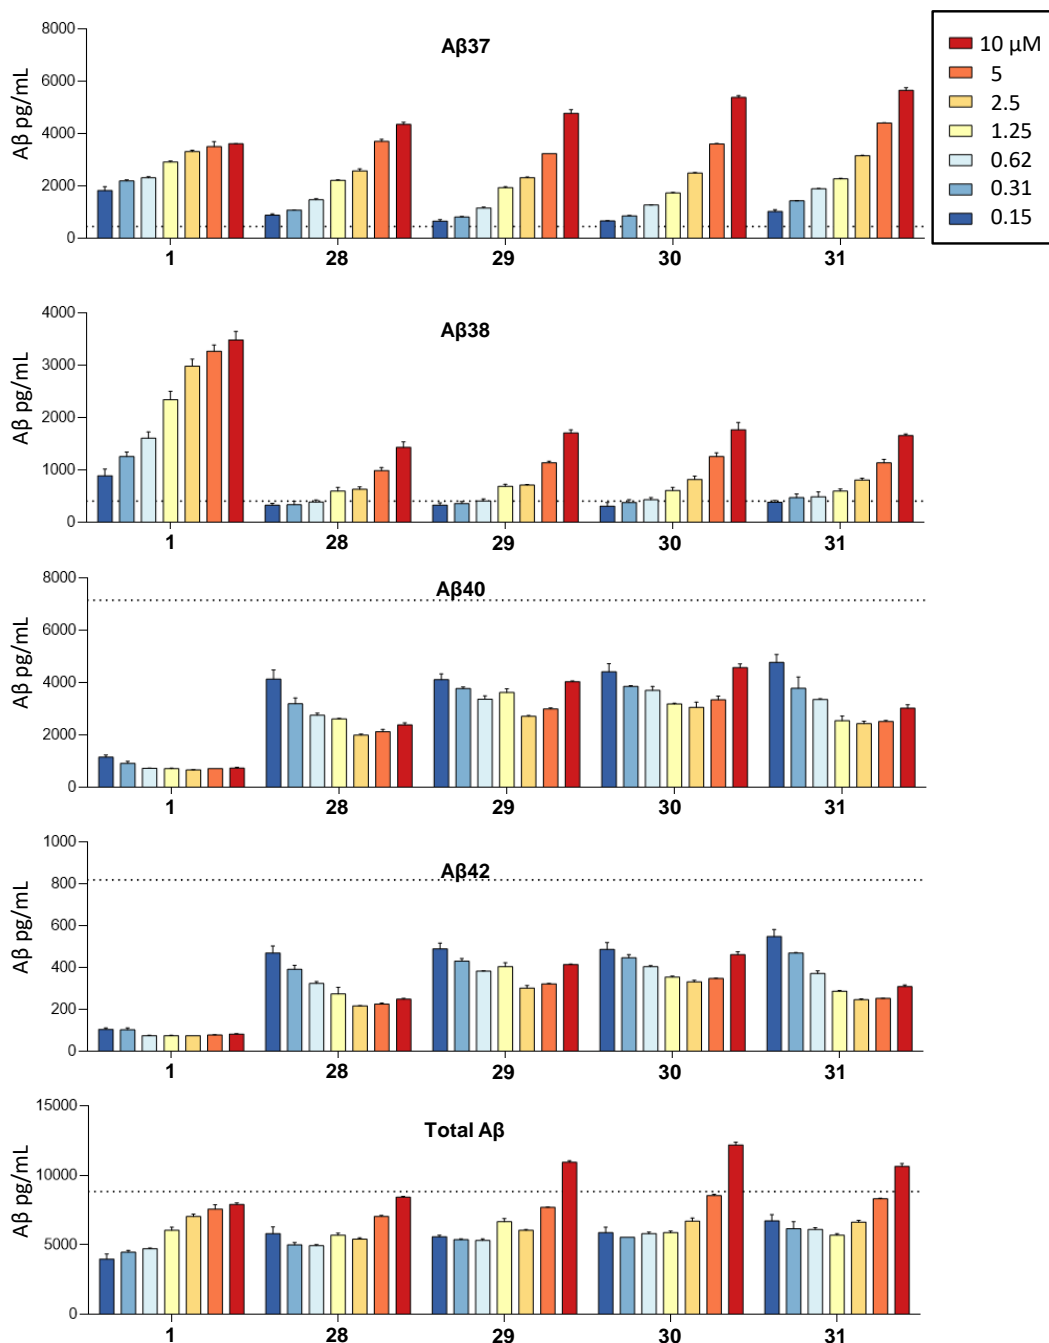

**Figure 3.** Concentration-dependent effects of **1** and **28-31** on Aβ from HEK293 cells stably transfected with APP C99. Individual Aβ variants (boxed) were measured by specific sandwich ELISAs. Level of each Aβ variant with vehicle alone is indicated by the dotted lines.

Despite the above limitations, the finding that AICD levels are not elevated by the new analogs implies that total Aβ levels (secreted and intracellular) are also not elevated, as equimolar levels of AICD and total Aβ peptides are produced by γ-secretase.<sup>19</sup> Therefore, elevations of Aβ37 and

A $\beta$ 38 should be due to reduction of longer forms of A $\beta$ . For prototype **1**, this is accounted for by reduction of A $\beta$ 40 and A $\beta$ 42. If lowering of A $\beta$ 40 and A $\beta$ 42 does not account for increased A $\beta$ 37 and A $\beta$ 38, this is likely due to stimulation of prior trimming events in addition to A $\beta$ 40→A $\beta$ 37 and A $\beta$ 42→A $\beta$ 38. Levels of A $\beta$ 40 and A $\beta$ 42 represent a balance between their degradation to shorter A $\beta$  peptides and their production from longer A $\beta$  peptides. Stimulation of trimming events involved in both the degradation and production of A $\beta$ 40 and A $\beta$ 42 would explain their blunted decreases even while end-products A $\beta$ 37 and A $\beta$ 38 (particularly the former) substantially increase.

We recently reported that 14 different familial AD mutations in the APP transmembrane region are all deficient in one or more carboxypeptidase trimming steps by  $\gamma$ -secretase, leading to elevated A $\beta$  peptides of 45 residues and longer.<sup>11</sup> These and similar findings with FAD mutations in presenilin<sup>10, 12</sup> suggest that such longer forms of A $\beta$  may contribute to the pathogenesis of AD.<sup>20</sup> Compounds that stimulate earlier trimming steps, in addition to the final trimming events A $\beta$ 40→A $\beta$ 37 A $\beta$ 42→A $\beta$ 38, might be useful chemical tools to interrogate the pathogenic role of long A $\beta$  peptides and may also have therapeutic potential.

**Acknowledgment.** This work was supported by NIH grants GM122894 to M.S.W. and AG15379 to D.J.S.

**Disclosures.** The authors declare no disclosures.

#### **Appendix A. Supporting Information.**

Supporting Information including detailed chemical and biological methods for this article can be found online.

## References

1. Querfurth HW, LaFerla FM. Alzheimer's disease. *N Eng J Med*. 2010;362(4): 329-344.
2. Wolfe MS. Structure and Function of the  $\gamma$ -Secretase Complex. *Biochemistry*. 2019;58(27): 2953-2966.
3. <http://www.alzforum.org/mutations>.
4. Selkoe DJ, Hardy J. The amyloid hypothesis of Alzheimer's disease at 25 years. *EMBO Mol Med*. 2016;8(6): 595-608.
5. Bursavich MG, Harrison BA, Blain JF. Gamma Secretase Modulators: New Alzheimer's Drugs on the Horizon? *J Med Chem*. 2016;59(16): 7389-7409.
6. Qi-Takahara Y, Morishima-Kawashima M, Tanimura Y, et al. Longer forms of amyloid  $\beta$ protein: implications for the mechanism of intramembrane cleavage by  $\gamma$ -secretase. *J Neurosci*. 2005;25(2): 436-445.
7. Takami M, Nagashima Y, Sano Y, et al.  $\gamma$ -Secretase: successive tripeptide and tetrapeptide release from the transmembrane domain of  $\beta$ -carboxyl terminal fragment. *J Neurosci*. 2009;29(41): 13042-13052.
8. Sato T, Dohmae N, Qi Y, et al. Potential link between amyloid  $\beta$ -protein 42 and C-terminal fragment  $\gamma$ 49-99 of  $\beta$ -amyloid precursor protein. *J Biol Chem*. 2003;278(27): 24294-24301.
9. Bolduc DM, Montagna DR, Seghers MC, Wolfe MS, Selkoe DJ. The amyloid- $\beta$  forming tripeptide cleavage mechanism of  $\gamma$ -secretase. *eLife*. 2016;5: pii: e17578.
10. Quintero-Monzon O, Martin MM, Fernandez MA, et al. Dissociation between the processivity and total activity of  $\gamma$ -secretase: implications for the mechanism of Alzheimer's disease-causing presenilin mutations. *Biochemistry*. 2011;50(42): 9023-9035.
11. Devkota S, Williams TD, Wolfe MS. Familial Alzheimer's disease mutations in amyloid protein precursor alter proteolysis by  $\gamma$ -secretase to increase amyloid  $\beta$ -peptides of >45 residues. *J Biol Chem*. 2021;296:100281.

12. Fernandez MA, Klutkowski JA, Freret T, Wolfe MS. Alzheimer presenilin-1 mutations dramatically reduce trimming of long amyloid  $\beta$ -peptides ( $A\beta$ ) by  $\gamma$ -secretase to increase 42-to-40-residue  $A\beta$ . *J Biol Chem*. 2014;289(45): 31043-31052.
13. Kounnas MZ, Danks AM, Cheng S, et al. Modulation of  $\gamma$ -secretase reduces beta-amyloid deposition in a transgenic mouse model of Alzheimer's disease. *Neuron*. 2010;67(5): 769-780.
14. Yang G, Zhou R, Guo X, Yan C, Lei J, Shi Y. Structural basis of  $\gamma$ -secretase inhibition and modulation by small molecule drugs. *Cell*. 2021;184(2): 521-533.e514.
15. Rynearson KD, Buckle RN, Barnes KD, et al. Design and synthesis of aminothiazole modulators of the  $\gamma$ -secretase enzyme. *Bioorg Med Chem Lett*. 2016;26(16): 3928-3937.
16. Ghodse SM, Telvekar VN. Synthesis of 2-aminothiazole derivatives from easily available thiourea and alkyl/aryl ketones using aqueous  $\text{NaCl}_2$ . *Tet Lett*. 2015;56(2): 472-474.
17. Bhuniya D, Mukkavilli R, Shivahare R, et al. Aminothiazoles: Hit to lead development to identify antileishmanial agents. *Eur J Med Chem*. 2015;102:582-93.
18. Liu L, Lauro BM, Wolfe MS, Selkoe DJ. Hydrophilic loop 1 of Presenilin-1 and the APP GxxxG transmembrane motif regulate  $\gamma$ -secretase function in generating Alzheimer-causing  $A\beta$  peptides. *J Biol Chem*. 2021;296:100393.
19. Kakuda N, Funamoto S, Yagishita S, et al. Equimolar production of amyloid  $\beta$ -protein and amyloid precursor protein intracellular domain from  $\beta$ -carboxyl-terminal fragment by  $\gamma$ -secretase. *J Biol Chem*. 2006;281(21): 14776-14786.
20. Wolfe MS. In search of pathogenic amyloid  $\beta$ -peptide in familial Alzheimer's disease. *Prog Mol Biol Transl Sci*. 2019;168:71-78.
